# Supplementary material for: Patient and Provider Characteristics Associated with Colorectal, Breast, and Cervical Cancer Screening among Asian Americans
Source: Oxford University Press journal article supplement (doi:10.1158/1055-9965.epi-14-0487), 2014-11-01
Supplement: 10559965epi140487-sup-131018_1_supp_2555804_n8gp13.docx [file 10559965epi140487-sup-131018_1_supp_2555804_n8gp13.docx]

| **Supplementary table 1: Selected patient characteristics by Cancer screening type and detailed Asian ethnicity** | | | | | | | | | |
| --- | --- | --- | --- | --- | --- | --- | --- | --- | --- |
| **Characteristic and Asian race subgroup** | **Cervical Cancer Screening1,2** | | | **Mammography Screening1,2** | | | **Colorectal Cancer Screening1,2** | | |
| **Age, Mean (SD)** |  |  |  |  |  |  |  |  |  |
| Asian Indian | 39 | (7.8) | <.0001 | 59 | (6.8) | <.0001 | 58 | (6.8) | <.0001 |
| Japanese | 48 | (10.1) | 60 | (6.7) | 61 | (6.8) |
| Chinese | 44 | (9.9) | 59 | (6.6) | 59 | (6.8) |
| Filipino | 44 | (10.8) | 60 | (6.5) | 60 | (6.7) |
| Korean | 42 | (8.5) | 59 | (7.0) | 59 | (7.5) |
| Vietnamese | 42 | (10.0) | 58 | (6.2) | 58 | (6.3) |
| Native Hawaiian, Pacific Islander | 42 | (11.0) | 59 | (6.6) | 60 | (7.0) |
| **Enrolled in “My health online”, N (%)** |  |  |  |  |  |  |
| Asian Indian | 1426 | (30.3%) | <.0001 | 612 | (30.1%) | 0.0057 | 6016 | (35.7%) | <.0001 |
| Japanese | 620 | (33.8%) | 373 | (33.4%) | 598 | (35.5%) |
| Chinese | 3283 | (34.5%) | 1764 | (33.9%) | 5023 | (37.0%) |
| Filipino | 1192 | (36.0%) | 731 | (35.1%) | 1898 | (39.7%) |
| Korean | 165 | (29.7%) | 94 | (27.7%) | 524 | (35.6%) |
| Vietnamese | 191 | (34.7%) | 102 | (33.0%) | 430 | (41.1%) |
| Native Hawaiian, Pacific Islander | 109 | (30.1%) | 62 | (31.3%) | 167 | (34.0%) |
| **Non-English speakers, N (%)** |  |  |  |  |  |  |  |  |  |
| Asian Indian | 407 | (8.6%) | <.0001 | 245 | (12.0%) | <.0001 | 1609 | (9.5%) | <.0001 |
| Japanese | 112 | (6.1%) | 90 | (8.0%) | 215 | (12.7%) |
| Chinese | 2509 | (26.4%) | 1487 | (28.6%) | 3191 | (23.5%) |
| Filipino | 281 | (8.4%) | 160 | (7.6%) | 216 | (4.5%) |
| Korean | 137 | (24.7%) | 78 | (23.0%) | 225 | (15.2%) |
| Vietnamese | 115 | (20.9%) | 72 | (23.3%) | 153 | (14.6%) |
| Native Hawaiian, Pacific Islander | 31 | (8.5%) | 20 | (10.1%) | 25 | (5.1%) |
| **Patient-physician language concordant (among non-English speakers), N (%)** |  |  |  |  |  |  |  |  |  |
| Asian Indian | 51 | (12.5%) | <.0001 | 24 | (9.7%) | <.0001 | 157 | (9.7%) | <.0001 |
| Japanese | 1 | (0.8%) | 1 | (1.1%) | 0 | (0.0%) |
| Chinese | 612 | (24.3%) | 346 | (23.2%) | 871 | (27.2%) |
| Filipino | 0 | (0.0%) | 0 | (0.0%) | 0 | (0.0%) |
| Korean | 0 | (0.0%) | 0 | (0.0%) | 1 | (0.4%) |
| Vietnamese | 45 | (39.1%) | 26 | (36.1%) | 44 | (28.7%) |
| Native Hawaiian, Pacific Islander | 2 | (6.4%) | 2 | (10.0%) | 2 | (8.0%) |
| **Patient-physician language discordance (among non-English speakers), N (%)** |  |  |  |  |  |  |  |  |  |
| Asian Indian | 356 | (87.4%) | <.0001 | 221 | (90.2%) | <.0001 | 1452 | (90.2%) | <.0001 |
| Japanese | 111 | (99.1%) | 89 | (98.8%) | 215 | (100.0%) |
| Chinese | 1897 | (75.6%) | 1141 | (76.7%) | 2320 | (72.7%) |
| Filipino | 281 | (100.0%) | 160 | (100.0%) | 216 | (100.0%) |
| Korean | 137 | (100.0%) | 78 | (100.0%) | 224 | (99.5%) |
| Vietnamese | 70 | (60.8%) | 46 | (63.8%) | 109 | (71.2%) |
| Native Hawaiian, Pacific Islander | 29 | (93.5%) | 18 | (90.0%) | 23 | (92.0%) |
| **Patient requires an interpreter (among non-English speakers), N (%)** |  |  |  |  |  |  |  |  |  |
| Asian Indian | 38 | (9.3%) | <.0001 | 22 | (8.9%) | <.0001 | 44 | (2.7%) | <.0001 |
| Japanese | 13 | (11.6%) | 11 | (12.2%) | 19 | (8.8%) |
| Chinese | 494 | (19.6%) | 290 | (19.5%) | 384 | (12.0%) |
| Filipino | 16 | (5.6%) | 5 | (3.1%) | 6 | (2.7%) |
| Korean | 27 | (19.7%) | 15 | (19.2%) | 27 | (12.0%) |
| Vietnamese | 29 | (25.2%) | 17 | (23.6%) | 24 | (15.6%) |
| Native Hawaiian, Pacific Islander | 2 | (6.4%) | 2 | (10.0%) | 3 | (12.0%) |
| **Primary care visits in last 2 years, Mean (SD)** |  |  |  |  |  |  |  |  |  |
| Asian Indian | 4.2 | (3.3) | <.0001 | 4.7 | (3.6) | <.0001 | 5.1 | (5.1) | <.0001 |
| Japanese | 4.2 | (3.0) | 4.3 | (3.1) | 4.2 | (3.9) |
| Chinese | 3.9 | (2.8) | 4.2 | (2.9) | 4.4 | (4.4) |
| Filipino | 4.8 | (3.2) | 5.0 | (3.4) | 4.9 | (4.7) |
| Korean | 4.4 | (3.0) | 4.7 | (3.3) | 4.7 | (4.8) |
| Vietnamese | 4.1 | (3.1) | 4.4 | (3.3) | 4.8 | (4.8) |
| Native Hawaiian, Pacific Islander | 4.7 | (4.0) | 4.8 | (3.5) | 5.1 | (4.8) |

1P values generated using chi-square test.

2N (%) figures correspond to patients who were positive (answered “Yes”) for the characteristic.
